# Supplementary material
Source: PubMed Central journal article supplement (PMC6692247)
Supplement: NIHMS1032590-supplement-Supp_figS1-6.pdf [file NIHMS1032590-supplement-Supp_figS1-6.pdf]

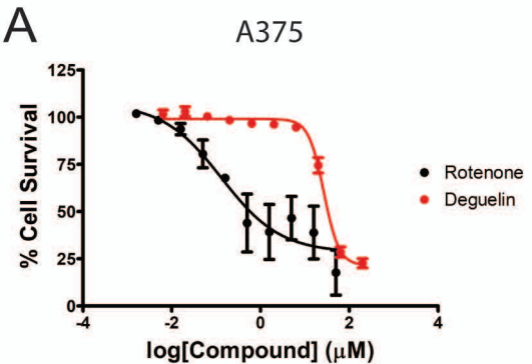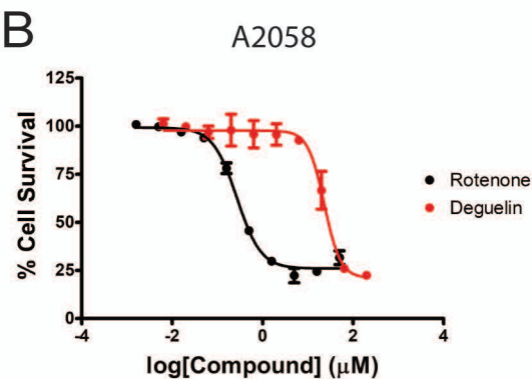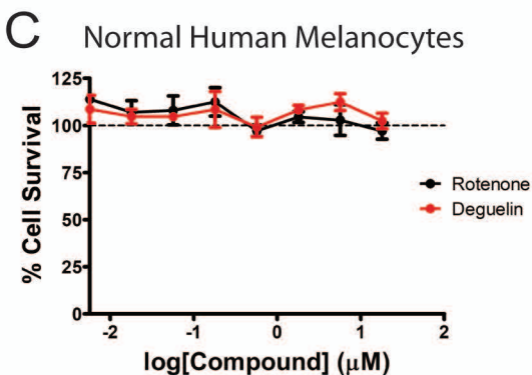

**Supplementary Figure 1**  
Carpenter et. al., 2019

A

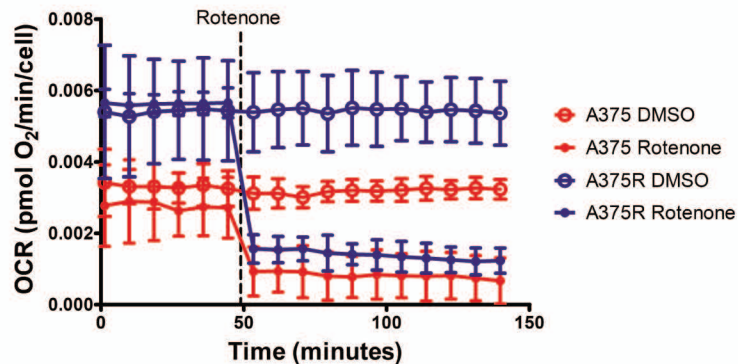

B

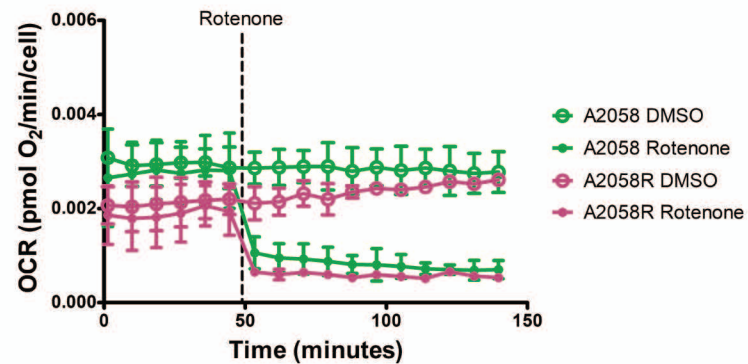

C

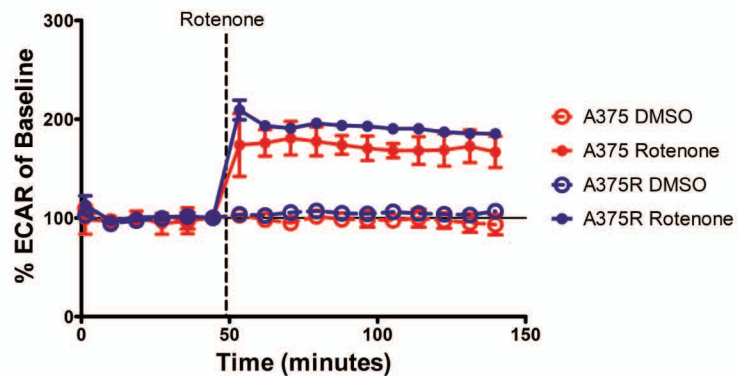

D

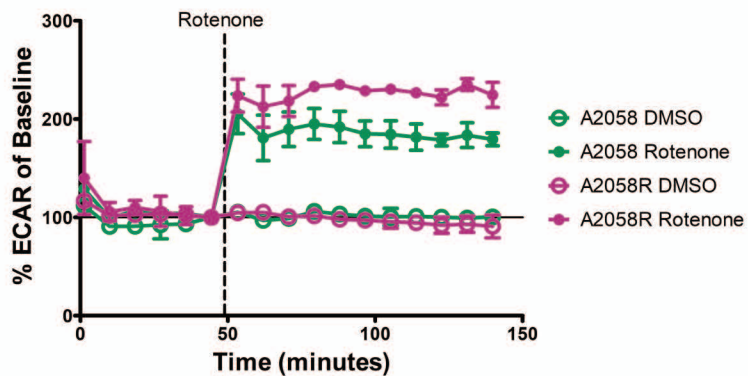

Supplementary Figure 2

Carpenter et. al., 2019

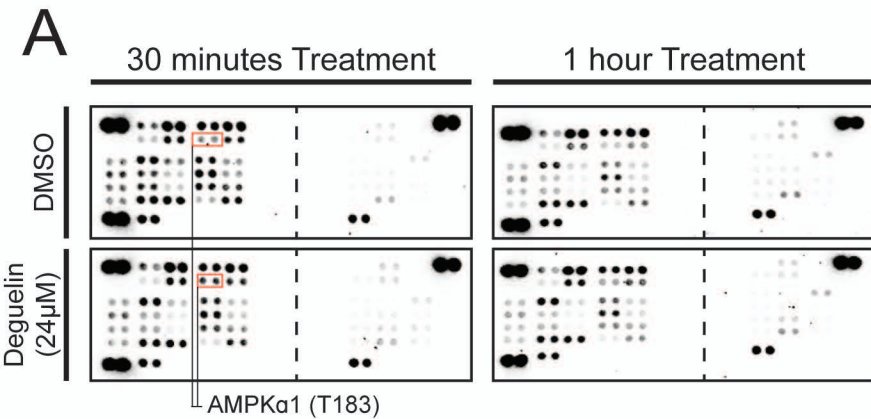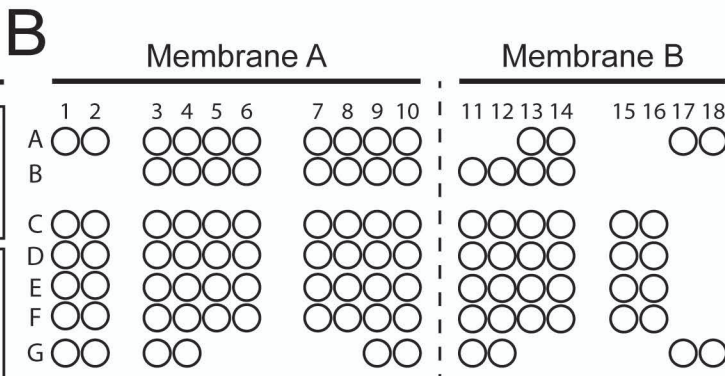

**C**

| Membrane/Coordinate | Target/Control | Phosphorylation Site |
|---------------------|----------------|----------------------|
| A-A1,A2-            | Reference Spot | -                    |
| A-A3,A4             | p38α           | T180/Y182            |
| A-A5,A6             | ERK1/2         | T202/Y204, T185/Y187 |
| A-A7,A8             | JNK1/2/3       | T183/Y185, T221/Y223 |
| A-A9,A10            | GSK-3 α/β      | S21/S9               |
| B-A13,A14           | p53            | S392                 |
| B-A17,A18           | Reference Spot | -                    |
| A-B3,B4             | EGFR           | Y1086                |
| A-B5,B6             | MSK1/2         | S376/S360            |
| A-B7, B8            | AMPKα1         | T183                 |
| A-B9, B10           | Akt 1/2/3      | S473                 |
| B-B11, B12          | Akt 1/2/3      | T308                 |
| B-B13, B14          | p53            | S46                  |
| A-C1, C2            | TOR            | S2448                |
| A-C3, C4            | CREB           | S133                 |
| A-C5, C6            | HSP27          | S78/S82              |
| A-C7, C8            | AMPKα2         | T172                 |
| A-C9, C10           | β-Catenin      | -                    |
| B-C11, C12          | p70 S6 Kinase  | T389                 |
| B-C13, C14          | p53            | S15                  |
| B-C15, C16          | c-Jun          | S63                  |
| A-D1, D2            | Src            | Y419                 |
| A-D3, D4            | Lyn            | Y397                 |
| A-D5, D6            | Lck            | Y394                 |
| A-D7, D8            | STAT2          | Y689                 |

| Membrane/Coordinate | Target/Control   | Phosphorylation Site |
|---------------------|------------------|----------------------|
| A-D9, D10           | STAT5a           | Y694                 |
| B-D11, D12          | p70 S6 Kinase    | T421/S424            |
| B-D13, D14          | RSK1/2/3         | S380/S386/S377       |
| B-D15, D16          | eNOS             | S1177                |
| A-E1, E2            | Fyn              | Y420                 |
| A-E3, E4            | Yes              | Y426                 |
| A-E5, E6            | Fgr              | Y412                 |
| A-E7, E8            | STAT6            | Y641                 |
| A-E9, E10           | STAT5b           | Y699                 |
| B-E11, E12          | STAT3            | Y705                 |
| B-E13, E14          | p27              | T198                 |
| B-E15, E16          | PLC-γ1           | Y783                 |
| A-F1, F2            | Hck              | Y411                 |
| A-F3, F4            | Chk-2            | T68                  |
| A-F5, F6            | FAK              | Y397                 |
| A-F7, F8            | PDGF Rβ          | Y751                 |
| A-F9, F10           | STAT5a/b         | Y694/Y699            |
| B-F11, F12          | STAT3            | S727                 |
| B-F13, F14          | WNK1             | T60                  |
| B-F15, F16          | PYK2             | Y402                 |
| A-G1, G2            | Reference Spot   | -                    |
| A-G3, G4            | PRAS40           | T246                 |
| A-G9, G10           | Negative Control | -                    |
| B-G11, G12          | HSP60            | -                    |
| B-G17, G18          | Negative Control | -                    |

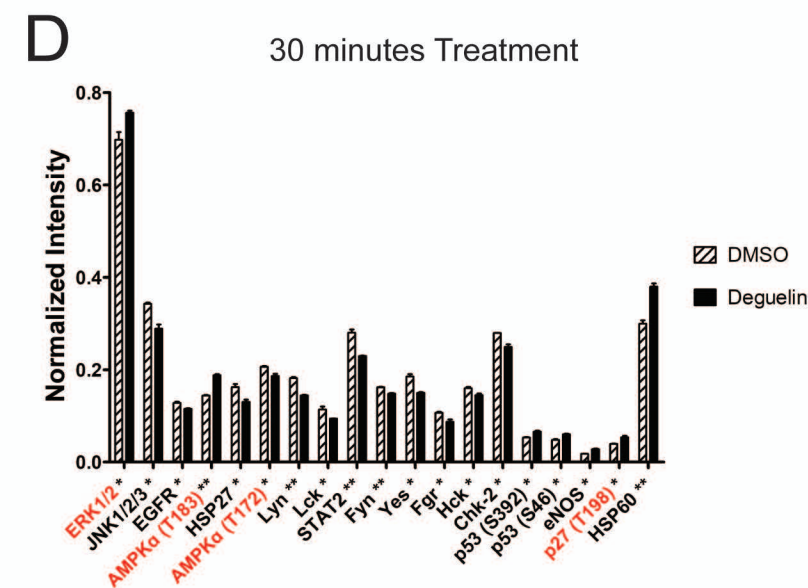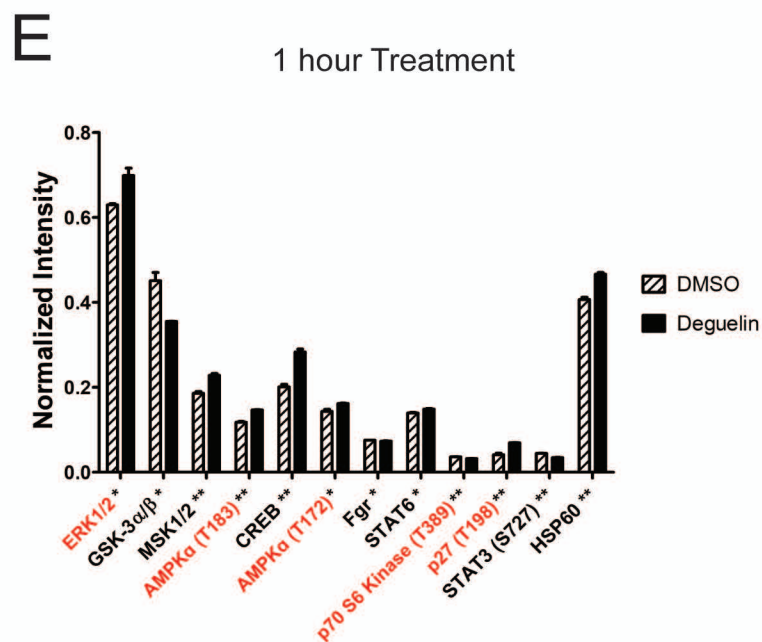

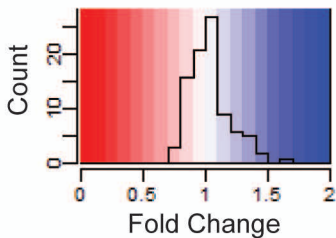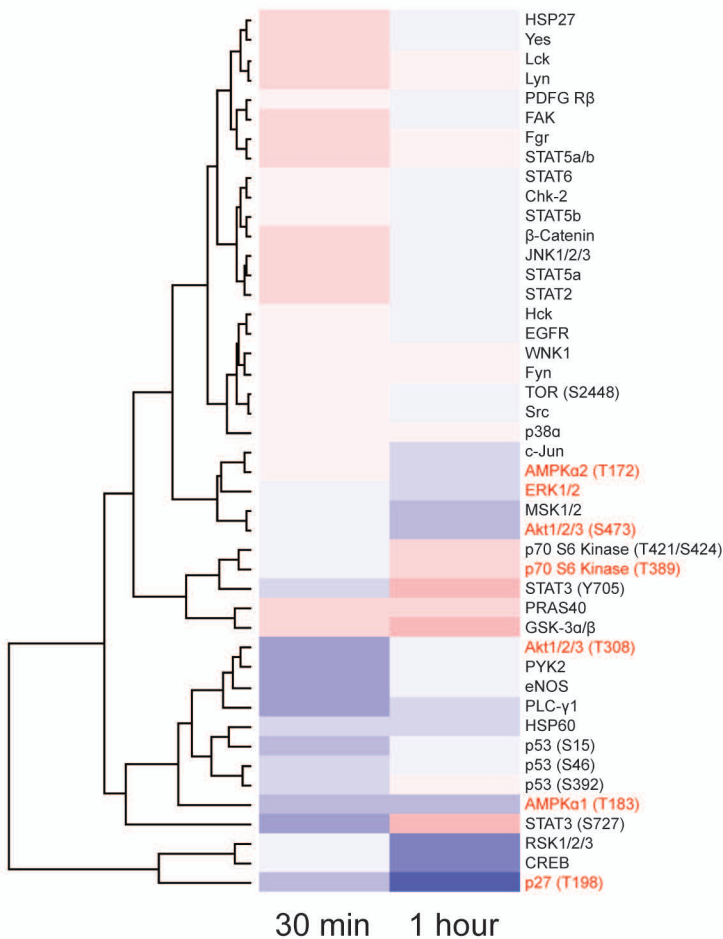

**Supplementary Figure 4**

Carpenter et. al., 2019



**A**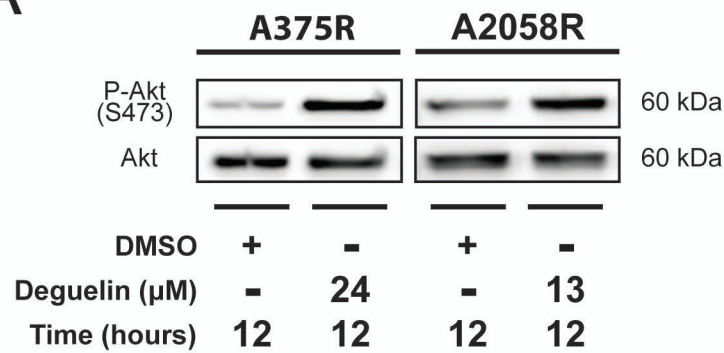**B**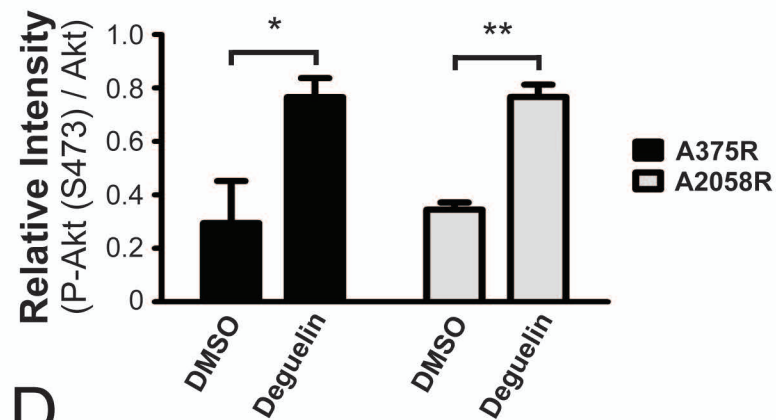**C**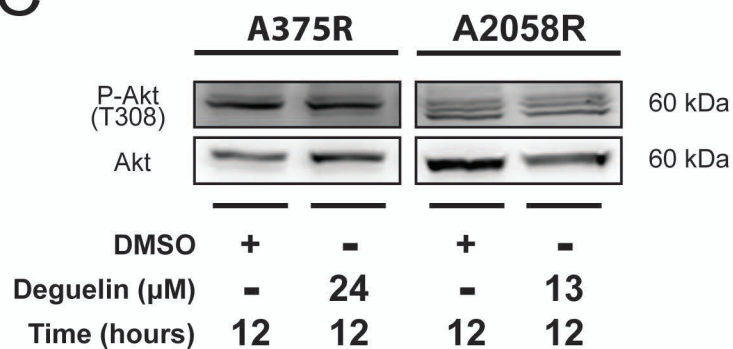**D**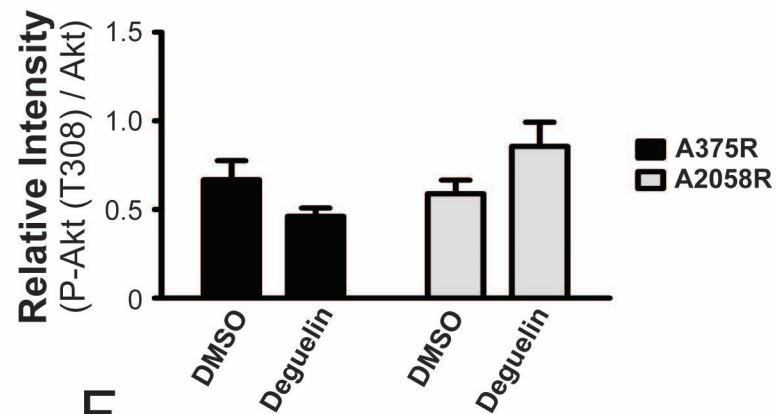**E**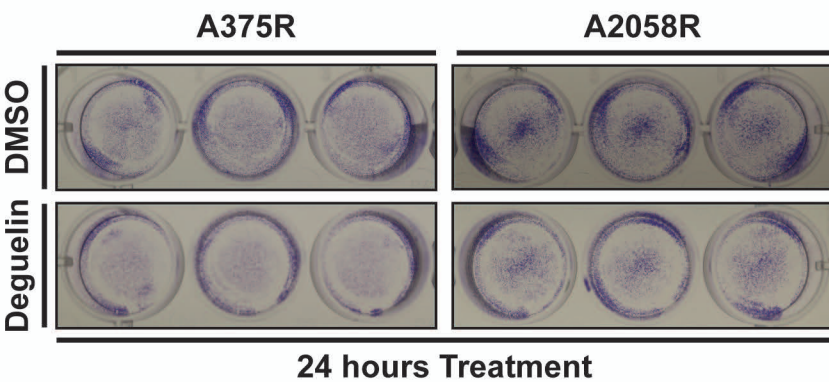**F**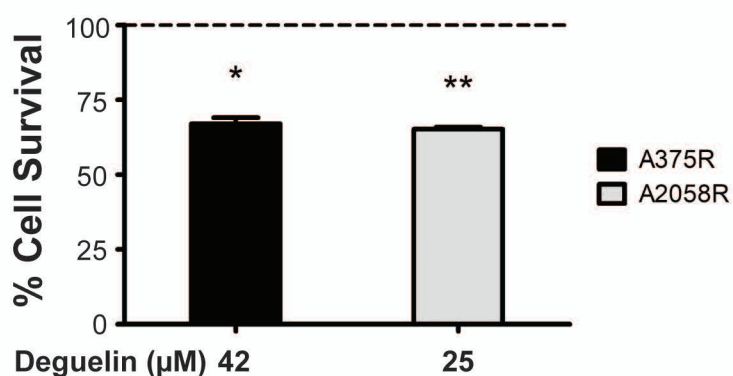**G**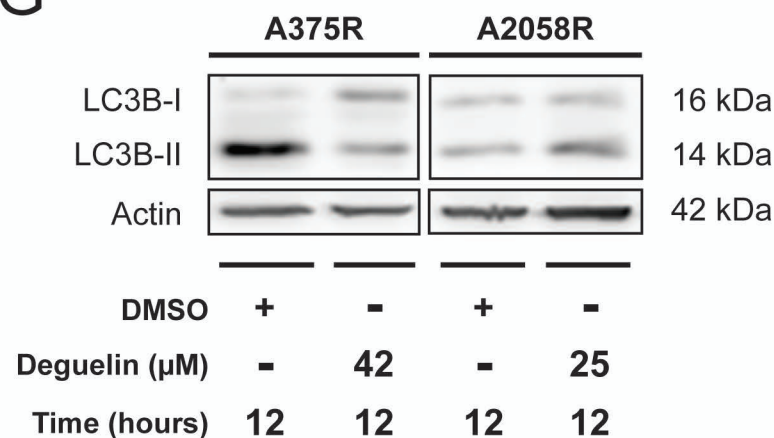**H**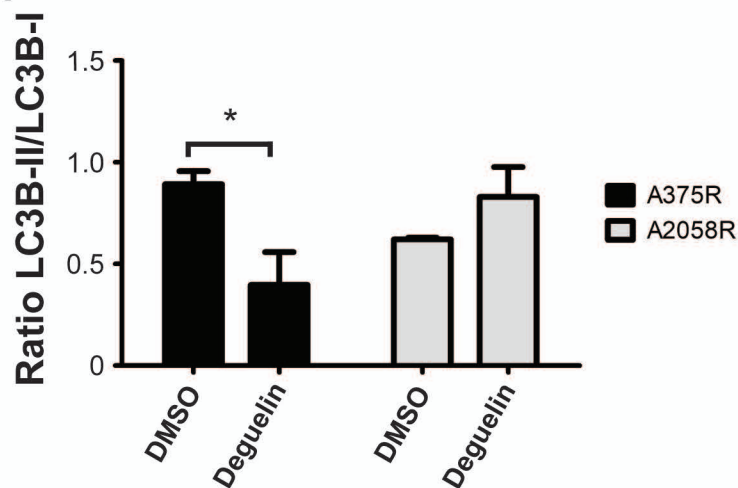

A

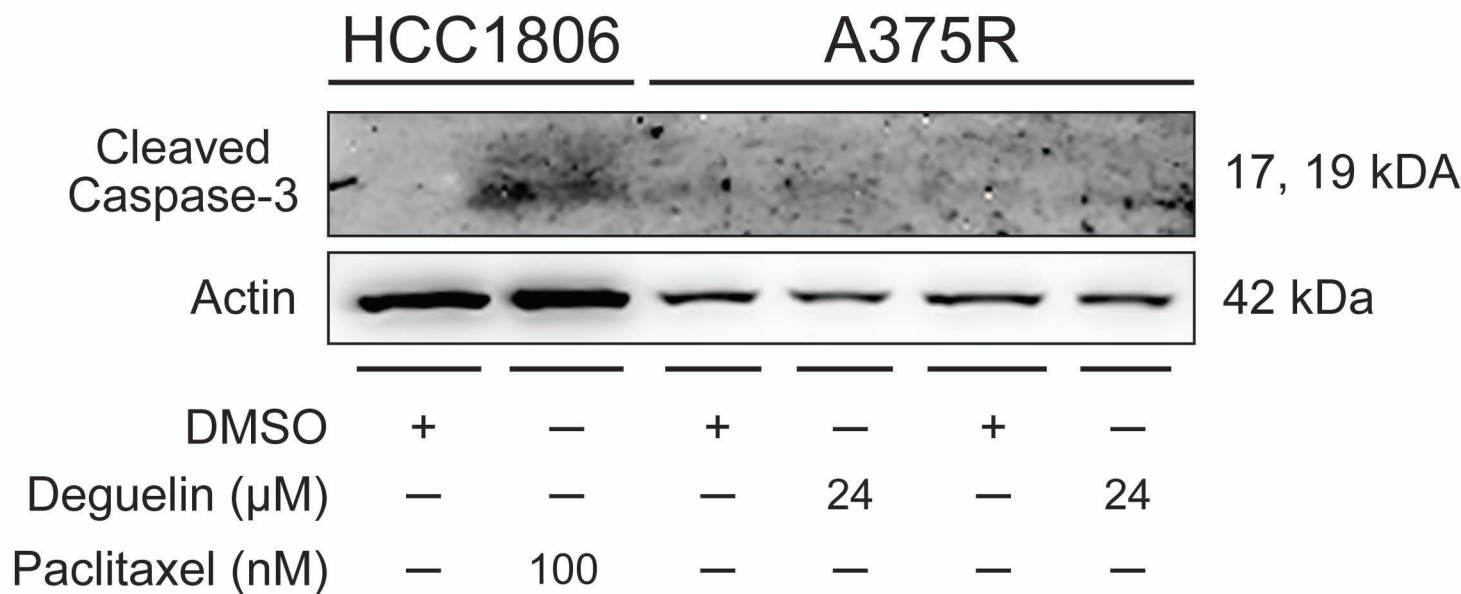

B

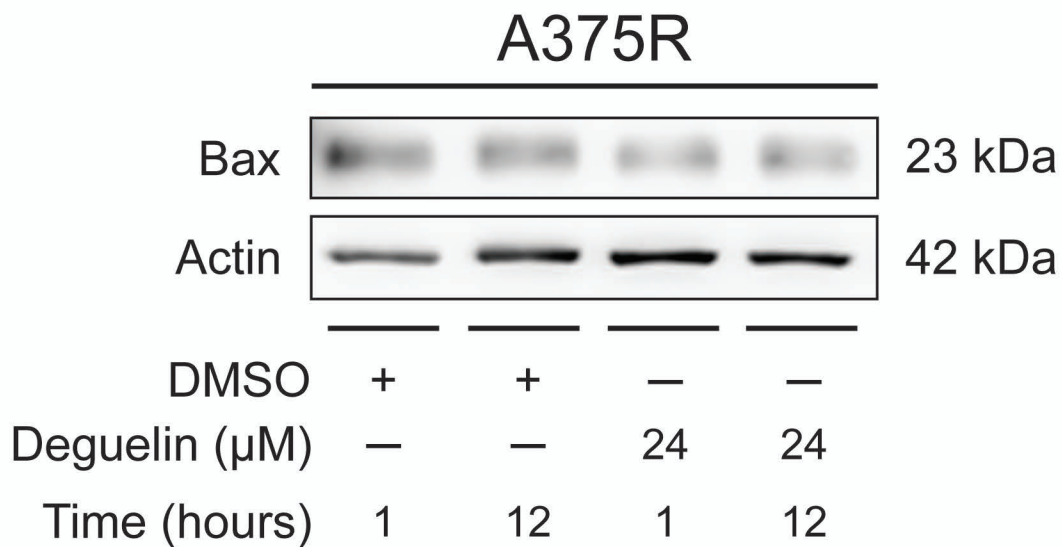

**Supplementary Figure 6**

Carpenter et. al., 2019
